## Erratum

### Original Articles Corrected According to 2016 Errata, Part I

The errors outlined in the previously published errata<sup>1–7</sup> from 2016 have been made in the currently available online versions of the corresponding articles.<sup>8–14</sup>

#### References

1. Sedation with dexmedetomidine or propofol impairs hypoxic control of breathing in healthy male volunteers: A nonblinded, randomized crossover study: Erratum. *ANESTHESIOLOGY* 2017; 126:360
2. “Protective ventilation” during anesthesia: Is it meaningful?: Erratum. *ANESTHESIOLOGY* 2017; 126:360
3. Preoperative evaluation clinic visit is associated with decreased risk of in-hospital postoperative mortality: Erratum. *ANESTHESIOLOGY* 2016; 125:1078
4. Effects of volatile anesthetics on mortality and postoperative pulmonary and other complications in patients undergoing surgery: A systematic review and meta-analysis: Erratum. *ANESTHESIOLOGY* 2016; 125:1078
5. Preoperative score to predict postoperative mortality (POSPOM): Derivation and validation: Erratum. *ANESTHESIOLOGY* 2016; 125:817–18
6. A slick way volatile anesthetics reduce myocardial injury: Erratum. *ANESTHESIOLOGY* 2016; 125:825
7. Fibrin network changes in neonates after cardiopulmonary bypass: Erratum. *ANESTHESIOLOGY* 2016; 125:610
8. Lodenius Å, Ebberyd A, Hårdemark Cedborg A, Hagel E, Mkrtchian S, Christensson E, Ullman J, Scheinin M, Eriksson LI, Jonsson Fagerlund M: Sedation with dexmedetomidine or propofol Impairs hypoxic control of breathing in healthy male volunteers: A nonblinded, randomized crossover study. *ANESTHESIOLOGY* 2016; 125:700–15
9. Hedenstierna G, Edmark L: “Protective ventilation” during anesthesia: Is it meaningful? *ANESTHESIOLOGY* 2016; 125:1079–82
10. Blitz JD, Kendale SM, Jain SK, Cuff GE, Kim JT, Rosenberg AD: Preoperative evaluation clinic visit is associated with decreased risk of in-hospital postoperative mortality. *ANESTHESIOLOGY* 2016; 125:280–94
11. Uhlig C, Bluth T, Schwarz K, Deckert S, Heinrich L, De Hert S, Landoni G, Serpa Neto A, Schultz MJ, Pelosi P, Schmitt J, Gama de Abreu M: Effects of volatile anesthetics on mortality and postoperative pulmonary and other complications in patients undergoing surgery: A systematic review and meta-analysis. *ANESTHESIOLOGY* 2016; 124:1230–45
12. Le Manach Y, Collins G, Rodseth R, Le Bihan-Benjamin C, Biccari B, Riou B, Devereaux PJ, Landais P: Preoperative score to predict postoperative mortality (POSPOM): Derivation and validation. *ANESTHESIOLOGY* 2016; 124:570–9
13. Wagner N-M, Gross ER, Patel HH: A slick way volatile anesthetics reduce myocardial injury. *ANESTHESIOLOGY* 2016; 124:986–8
14. Brown AC, Hannan RH, Timmins LH, Fernandez JD, Barker TH, Guzzetta NA: Fibrin network changes in neonates after cardiopulmonary bypass. *ANESTHESIOLOGY* 2016; 124:1021–31

## Erratum

### Original Articles Corrected According to 2016 Errata, Part II

The errors outlined in the previously published errata<sup>1–4</sup> from 2016 have been made in the currently available online versions of the corresponding articles.<sup>5–8</sup>

#### References

1. Perioperative comparative effectiveness of anesthetic technique in orthopedic patients: Erratum. *ANESTHESIOLOGY* 2016; 125:610
2. Residual neuromuscular block in the elderly: Incidence and clinical implications: Erratum. *ANESTHESIOLOGY* 2016; 124:1201
3. Major adverse events and relationship to nil per os status in pediatric sedation/anesthesia outside the operating room: A report of the pediatric sedation research consortium: Erratum. *ANESTHESIOLOGY* 2016; 124:1202
4. Association between intraoperative hypotension and hypertension and 30-day postoperative mortality in noncardiac surgery: Erratum. *ANESTHESIOLOGY* 2016; 125:825
5. Memsoudis SG, Sun X, Chiu YL, Stundner O, Liu SS, Banerjee S, Mazumdar M, Sharrock NE: Perioperative comparative effectiveness of anesthetic technique in orthopedic patients. *ANESTHESIOLOGY* 2013; 118:1046–58
6. Murphy GS, Szokol JW, Avram MJ, Greenberg SB, Shear TD, Vender JS, Parikh KN, Patel SS, Patel A: Residual neuromuscular block in the elderly: Incidence and clinical implications. *ANESTHESIOLOGY* 2015; 123:1322–36
7. Beach ML, Cohen DM, Gallagher SM, Cravero JP: Major adverse events and relationship to nil per os status in pediatric sedation/anesthesia outside the operating room: A report of the pediatric sedation research consortium. *ANESTHESIOLOGY* 2016; 124:80–8
8. Monk TG, Bronsart MR, Henderson WG, Mangione MP, Sum-Ping ST, Bentt DR, Nguyen JD, Richman JS, Meguid RA, Hammermeister KE: Association between intraoperative hypotension and hypertension and 30-day postoperative mortality in noncardiac surgery. *ANESTHESIOLOGY* 2015; 123:307–19
